1

2

3

4

## The genomic health of ancient hominins

5

6

7

Ali J. Berens<sup>1</sup>, Taylor L. Cooper<sup>1</sup>, and Joseph Lachance<sup>1\*</sup>

8

9

10

11 <sup>1</sup>School of Biological Sciences, Georgia Institute of Technology, Atlanta, GA 30332

12 \*lachance.joseph@gmail.com

13

14

15

16 Keywords: ancient DNA, genetic disease risks, human evolution, population genetics,

17 predictive health

18 **ABSTRACT**

19 The genomes of ancient humans, Neandertals, and Denisovans contain many alleles  
20 that influence disease risks. Using genotypes at 3180 disease-associated loci, we  
21 estimated the disease burden of 147 ancient genomes. After correcting for missing  
22 data, genetic risk scores were generated for nine disease categories and the set of all  
23 combined diseases. These genetic risk scores were used to examine the effects of  
24 different types of subsistence, geography, and sample age on the number of risk alleles  
25 in each ancient genome. On a broad scale, hereditary disease risks are similar for  
26 ancient hominins and modern-day humans, and the GRS percentiles of ancient  
27 individuals span the full range of what is observed in present day individuals. In  
28 addition, there is evidence that ancient pastoralists may have had healthier genomes  
29 than hunter-gatherers and agriculturalists. We also observed a temporal trend whereby  
30 genomes from the recent past are more likely to be healthier than genomes from the  
31 deep past. This calls into question the idea that modern lifestyles have caused genetic  
32 load to increase over time. Focusing on individual genomes, we find that the overall  
33 genomic health of the Altai Neandertal is worse than 97% of present day humans and  
34 that Ötzi the Tyrolean Iceman had a genetic predisposition to gastrointestinal and  
35 cardiovascular diseases. As demonstrated by this work, ancient genomes afford us new  
36 opportunities to diagnose past human health, which has previously been limited by the  
37 quality and completeness of remains.

## 38 INTRODUCTION

39 Ancient human remains yield valuable information about the health and disease of  
40 individuals from the past. Skeletal remains provide details about medical practices  
41 (Andrushko and Verano 2008) and certain diseases, such as cancers (Binder, et al.  
42 2014; Odes, et al. 2016) and rheumatic diseases (Entezami, et al. 2011) that visibly  
43 alter or affect bone. However, many diseases do not leave their mark on bone; instead,  
44 they cause soft tissue damage requiring mummified remains for diagnosis. One of the  
45 best studied set of mummified human remains is the Tyrolean Iceman, a well-preserved  
46 5300-year-old Neolithic man discovered in the Ötztal Alps. Examination of his remains  
47 shows hardening arteries suggesting that this man possessed a predisposition for  
48 coronary heart disease (Murphy, et al. 2003). Further evidence from the sequencing of  
49 the Iceman's genome supports this diagnosis (Keller, et al. 2012) and demonstrates that  
50 modern risk alleles can accurately predict disease risk in ancient individuals. In addition  
51 to heart disease, genetic data also indicate that the Iceman was likely lactose intolerant,  
52 had type O blood, and had brown eyes (Keller, et al. 2012). Unfortunately, not all  
53 ancient human samples are as complete and well-preserved as the Tyrolean Iceman.  
54 Genomic information may shed new light on the health of ancient individuals, especially  
55 when soft tissue and skeletal evidence are unavailable.

56 To estimate the health of different individuals, genetic information can be  
57 converted into a quantitative measure of hereditary disease burden, which we refer to  
58 as a genetic risk score (GRS). GRS have already been used to estimate disease risk in  
59 modern humans (Chatterjee, et al. 2016). Assuming that disease loci act independently,  
60 one way to calculate GRS is to sum the number of risk alleles across all disease loci

61 after weighting each allele by its effect size (Corona, et al. 2013). The majority of known  
62 disease alleles have been identified in present-day Europeans through genome wide  
63 association studies (GWAS) using microarrays, which are known to contain a biased set  
64 of genetic variants (Lachance and Tishkoff 2013). Despite this bias, genetic risk scores  
65 can still be informative about disease risk. For example, GRS for breast, colorectal, and  
66 bladder cancer and coronary heart disease accurately predict risk of each disease while  
67 offering insights into prevention and treatment options (Chatterjee, et al. 2016). Not only  
68 can GRS be applied to specific traits, but genetic risk can also be estimated for the  
69 entire genome.

70 One significant limitation of ancient DNA studies is that most genomes are not  
71 complete, which makes it more challenging to estimate disease risk. Genomes may be  
72 incomplete due to contamination (Orlando, et al. 2015), DNA degradation (Hofreiter, et  
73 al. 2015), or low coverage sequencing, as has been the case with large cohort studies  
74 (Mathieson, et al. 2015; Lazaridis, et al. 2016). One approach to address missing  
75 genomic data is to impute genotypes at disease-associated loci (Sainz, et al. 1989; Li,  
76 Willer, et al. 2009). However, imputation of ancient genotypes is challenging because of  
77 small sample sizes. To avoid imputation errors, genetic risk scores for each ancient  
78 sample can be calculated using only loci with successful genotype calls (i.e. genetic risk  
79 scores for each sample use a different set of disease loci). Each ancient genome can  
80 then be compared to modern genomes at a matched set of disease loci to generate  
81 standardized GRS percentiles, which enables comparisons between different ancient  
82 genomes.

83           There has been recent debate about whether rates of sequence change in  
84 human genomes have increased over time. Hawks, et al. (2007) suggest that rates of  
85 adaptive evolution have been accelerating over the last 40,000 years, especially within  
86 the last 5,000 years. The holocene has brought new selective pressures associated with  
87 the transition from hunting and gathering to agricultural practices (Hawks, et al. 2007).  
88 Genes involved in subsistence and dietary changes along with disease resistance  
89 genes show strong positive selection (Hawks, et al. 2007; Field, et al. 2016). Others  
90 have argued that there has not been enough time for selection to expel deleterious  
91 alleles that lead to evolutionary mismatches between our genomes and modern  
92 environments (Cordain, et al. 2005). More recently, modern medicine and changes in  
93 living conditions may have led to the relaxation of selective pressures within the last  
94 century. Along these lines, Lynch (2016) argues that there has been a substantial  
95 increase in the mutational load of modern humans (on the order of 1% reduction in  
96 fitness per generation). However, Roth and Wakeley (2016) contend that the relaxation  
97 of selective pressures is not as severe as suggested by Lynch (2016).

98           With this debate in mind, our study estimated the genomic health of ancient  
99 individuals by combining disease-association information from the NHGRI-EBI GWAS  
100 Catalog with publicly available genomes of ancient hominin samples. We investigated  
101 relationships between genetic disease risk and sample age. We further explored this  
102 dataset by determining whether genetic risks vary for individuals who practiced different  
103 types of subsistence and examined whether ancient GRS follow a geographic cline.  
104 Finally, we probed differences in genomic health between modern and ancient hominins  
105 by calculating genetic risk scores for different disease categories.

106

107

## 108 **MATERIALS AND METHODS**

### 109 **Disease-associated loci**

110         The set of all known autosomal disease-associated alleles was downloaded from  
111 the NHGRI-EBI Catalog of published GWAS studies ([www.ebi.ac.uk/gwas](http://www.ebi.ac.uk/gwas); last  
112 accessed on September 28, 2016) (Burdett, et al. 2016; MacArthur, et al. 2017). Any  
113 non-disease-associated alleles (e.g., hair color, blood pressure, and amount of sleep)  
114 were removed from consideration. We also filtered out disease-associated alleles from  
115 the GWAS Catalog that were missing p-value, odds ratio, and/or allele frequency  
116 information. When SNPs were associated with the same disease in multiple GWAS, we  
117 retained the SNP with the strongest disease association (i.e. lowest p-value). To ensure  
118 independence between variants associated with a given disease, we included only loci  
119 that were not in linkage disequilibrium with other disease variants. This involved keeping  
120 the strongest disease association (i.e. lowest p-value) whenever two SNPs were located  
121 within 100kb of each other. After filtering, we were left with 3180 autosomal disease-  
122 associated alleles from 578 GWAS. We classified all remaining disease-associated loci  
123 into nine categories (allergy/autoimmune, cancers, cardiovascular, dental/periodontal,  
124 gastrointestinal/liver, metabolism/weight, miscellaneous, morphological/muscular, and  
125 neurological/psychological). These disease categories are not mutually exclusive, so a  
126 single locus could be grouped into multiple categories (e.g., Crohn's disease is both an  
127 autoimmune and a gastrointestinal disease). Note that many disease-associated loci  
128 tend are older SNPs that have intermediate frequency alleles (Lachance 2010).

129 Because of this, many GWAS alleles can also be found in Neanderthal and Denisovan  
130 genomes.

131

### 132 **Ancient hominin genomes**

133 We downloaded all known publicly available ancient hominin genomes (449  
134 genomes as of July 1, 2016) and identified genotypes at the 3180 focal disease-  
135 associated loci. For genomes that were only available as alignments to the human  
136 reference genome, we called genotypes from these alignments using the ‘mpileup’  
137 function in SAMtools (v. 1.3) (Li, Handsaker, et al. 2009; Li 2011). We retained ancient  
138 hominin samples that had genotype calls at greater than fifty percent of the focal 3180  
139 disease-associated loci, after which 147 ancient genomes from 22 studies remained.  
140 This filter was used to ensure sufficient genotype information for subsequent analyses.  
141 Figure 1 displays the geographic locations of the 147 focal ancient individuals, which  
142 were jittered to clarify densely sampled locations.

143

### 144 **Modern human genomes**

145 We downloaded modern human genomes from phase 3 of the 1000 Genomes  
146 Project (The 1000 Genomes Project Consortium 2015), and we integrated this genomic  
147 data with our 3180 focal disease-associated loci. At each of the 3180 loci, we obtained  
148 the allele frequencies for the five continental super-populations of modern humans from  
149 the 1000 Genomes Project (AFR, AMR, EAS, EUR, and SAS).

150

### 151 **Genetic risk scores**

152 For each ancient sample, we estimated GRS across all diseases and for each  
153 disease category by combining genotypic information and effect sizes. All ancient  
154 hominins were missing genotypic information at some of the disease-associated loci. To  
155 account for this missing information, we calculated GRS for each ancient individual ( $i$ )  
156 from the set of disease-associated loci with genotypic calls in that individual ( $L_i$ ):

$$157 \quad GRS_i = \sum_{l=1}^{L_i} \beta_l \times (\# \text{ of copies of the risk allele at locus } l \text{ in ancient individual } i)$$

158 where  $\beta_l = \ln$  (odds ratio at locus  $l$ ). Because each ancient sample contains a different  
159 set of disease-associated loci with genotype calls, GRS are not directly comparable  
160 across individuals.

161 To enable comparisons across individuals, we converted raw GRS statistics into  
162 standardized GRS percentiles (see Figure 2 for a pictorial representation). For each  
163 ancient genome, this involved simulating 100,000 modern individuals at a matched set  
164 of disease loci. Genotypes at disease loci were simulated for 20,000 modern individuals  
165 for each of the five super-population from the 1000 Genomes Project (AFR, AMR, EAS,  
166 EUR, and SAS). Each diploid genotype was drawn from a binomial distribution using the  
167 'rbinom' function in R where the probability of drawing each risk allele is equal to the  
168 allele frequency for the given super-population. These simulations assume that disease  
169 loci are independent (i.e. they are in linkage equilibrium). Sites that were uncalled in the  
170 focal ancient genome were masked in the simulations of modern genomes. Genetic risk  
171 scores were then calculated for each modern individual ( $j$ ) using a matched set of called  
172 loci ( $L_i$ ) for each focal ancient individual ( $i$ ):



173 
$$GRS_{i,j} = \sum_{l=1}^{L_i} \beta_l \times (\# \text{ of copies of the risk allele at locus } l \text{ in modern individual } j)$$

174 Then, we compared the genetic risk score of each ancient individual to the distribution  
175 of the simulated modern genetic risk scores using the empirical cumulative density  
176 function (ecdf) function in R. This enabled us to obtain the percentile rank of each  
177 ancient sample relative to modern individuals, i.e. the standardized GRS percentile of  
178 each ancient genome. We repeated this standardization process for each ancient  
179 genome, then used the standardized GRS percentiles to compare genetic risk amongst  
180 ancient individuals and between ancient and modern hominins. Higher percentiles  
181 indicate less healthy genomes. Standardized GRS percentiles were calculated for the  
182 set of all combined diseases and for each disease category. Ancient genomes with risk  
183 scores below the range of their matched set of modern genomes have standardized  
184 GRS percentiles of 0%, and ancient genomes with risk scores above the range of their  
185 matched set of modern genomes have standardized GRS percentiles of 100%. An R  
186 Shiny (Chang, et al. 2017) interactive web application of our results can be found at:  
187 <http://popgen.gatech.edu/ancient-health/>.

188

## 189 **Statistical tests**

190 For the set of all disease-associated SNPs and each disease category, we tested  
191 for differences between the GRS of modern humans and ancient hominins. By  
192 definition, the GRS percentiles of modern humans follow a uniform distribution that  
193 ranges between zero and one. If ancient hominins have the same genomic risk of  
194 disease as modern humans, the standardized GRS percentile of ancient samples will

195 also be uniformly distributed. We used a Kolmogorov-Smirnov test to determine whether  
196 the distribution of ancient hominin standardized GRS percentiles is, in fact, uniformly  
197 distributed. With Wilcoxon signed rank tests and continuity corrections, we also tested  
198 for a shift in the ancient hominin standardized GRS percentile distribution compared to  
199 the expectation of the modern human distribution (centered around 0.5).

200 Amongst the ancient hominin samples, we investigated whether there are  
201 relationships between standardized GRS percentile and sample age, mode of  
202 subsistence, and geographic location. These tests were run for all disease loci (overall  
203 GRS percentiles) and by disease category. We separated ancient samples into six  
204 sample age bins (n = number of samples; < 3500 [n = 20], 3500-4999 [n = 48], 5000-  
205 6499 [n = 34], 6500-7999 [n = 10], 8000-9499 [n = 24], and  $\geq$  9500 years before present  
206 [n = 11]). We then tested whether there is a difference in standardized GRS percentile  
207 based on sample age bin using a Kruskal-Wallis test. The Kruskal-Wallis test is a rank-  
208 based nonparametric test that can be used to determine if the differences between two  
209 or more groups are significant. Following rejection of this test, we performed post-hoc  
210 multiple pairwise comparisons using Dunn tests to determine which ages were  
211 significantly different from each other. Dunn tests generate z-statistics from rank sums.  
212 The Benjamini-Hochberg method was used to correct for multiple comparisons. We also  
213 used a Jonckheere-Terpstra test, similar to Kruskal-Wallis except that the alternative  
214 hypothesis is ordered, to determine whether standardized GRS percentile increased  
215 with sample age bin. Mode of subsistence varies across ancient samples (n = number  
216 of samples; agriculturalist [n = 106], hunter-gatherer [n = 22], and pastoralist [n = 19]).  
217 Differences in standardized GRS percentiles due to mode of subsistence were

218 assessed by Kruskal Wallis tests followed by post-hoc pairwise multiple comparisons  
219 with Dunn tests. These non-parametric tests do not require groups to have equal  
220 sample sizes. Using Pearson's correlation, we also tested for an association between  
221 standardized GRS percentile and North-South (latitude) or East-West (longitude)  
222 gradients.

223

## 224 **RESULTS**

### 225 **Overall genetic risks**

226 On the whole, ancient samples had GRS that were similar to individuals living in  
227 the present (Figure 3A; Supplemental Table S1). Figure 3A shows that the distribution  
228 of standardized GRS percentiles of ancient individuals spans the full range of modern  
229 humans. In general, most GRS scores are evenly distributed. However, there is an  
230 excess of ancient hominins who have standardized GRS percentiles below 5%, which  
231 causes the distribution of standardized GRS percentiles to be positively skewed  
232 (Kolmogorov-Smirnov test,  $D = 0.265$ ,  $p\text{-value} = 2.04 \times 10^{-9}$ ). Using a Wilcoxon signed  
233 rank test, we find that the ancient samples have, on average, lower predicted genomic  
234 risk than modern humans (Table 1). However, GRS calculations for ancient samples  
235 may underestimate the total amount of genetic risk, as many disease alleles that  
236 segregated in the past remain undiscovered.

237 Data quality of the ancient genomes varies across samples, so we also tested  
238 whether there were any systematic biases in GRS calculations due to sample quality.  
239 Both sequencing coverage and the proportion of disease loci that are called may  
240 potentially affect whether an individual has a high or low GRS. Based on Pearson's

241 correlation, there is a weak, yet significant, positive relationship between standardized  
242 GRS percentiles and sequencing coverage for ancient samples (Figure 4A,  $R^2 = 0.087$ ,  
243  $p\text{-value} = 3.0 \times 10^{-4}$ ). However, this pattern may be driven by a small number of outliers,  
244 including the Altai Neandertal genome (sequencing coverage: 52x, standardized GRS  
245 percentile: 97%). Encouragingly, standardized GRS percentiles are largely independent  
246 of the proportion of disease-associated loci that are able to be successfully called in  
247 each ancient sample (Figure 4B,  $R^2 = 0.013$ ,  $p\text{-value} = 0.17$ ). Taken together, these  
248 patterns indicate that our GRS calculations are largely free of biases due to sample  
249 quality.

250

### 251 *Effects of sample age*

252 Figure 3A clearly shows that disease risk varies greatly amongst ancient  
253 hominins, so we investigated whether genetic risk scores follow a temporal pattern.  
254 Samples were binned into six age ranges, the most recent of which includes individuals  
255 that lived less than 3500 years before present and the oldest of which includes  
256 individuals who lived at least 9500 years before present (BP). Among ancient samples,  
257 there is a difference in the standardized GRS percentile based on sample ages  
258 (Kruskal-Wallis test,  $\chi^2 = 15.24$ ,  $df = 5$ ,  $p\text{-value} = 0.009$ ). From Figure 3B, it is evident  
259 that the oldest samples are at much greater genetic risk than more recent samples. We  
260 compared standardized GRS percentiles between pairs of sample age ranges using  
261 Dunn tests with Benjamini-Hochberg corrections and found that the oldest age range ( $\geq$   
262 9500 years BP) is significantly higher than the two most recent age ranges ( $< 3500$  and  
263 3500-4999 years BP,  $p\text{-values} < 0.007$ ). Following up on this result, we examined

264 whether genetic risks progressively improved with time. Results of a Jonckheere-  
265 Terpstra test appear to support this proposition ( $p$ -value = 0.001; Table 1), as genetic  
266 disease risk increased with later age ranges. This temporal trend is not due to  
267 differences in sequence coverage. Our results are robust to the inclusion or exclusion of  
268 archaic hominins: when Neanderthal and Denisovan samples are removed, the oldest  
269 age class has a median GRS percentile of 0.88.

270

### 271 *Subsistence type*

272 The number of risk alleles in each ancient genome may also vary by the mode of  
273 subsistence, i.e. whether individuals practiced a hunter-gatherer, agricultural, or  
274 pastoral lifestyle. We tested this hypothesis by performing a Kruskal-Wallis test.  
275 Comparisons of ancient standardized GRS indicate that form of subsistence affects  
276 estimated genetic risk of disease (Table 1). Following up on this result, we used a post-  
277 hoc Dunn test with Benjamini-Hochberg correction to determine which types of  
278 subsistence are different from each one another. Pastoralists have significantly lower  
279 standardized GRS percentiles than agriculturalists and hunter-gatherers, while the  
280 standardized GRS percentiles are not significantly different between agriculturalists and  
281 hunter-gatherers (Table 2). Figure 3C shows that the distribution of standardized GRS  
282 percentiles for ancient pastoralists is shifted into to the healthy range of modern  
283 humans. We find that the genomes of ancient pastoralists have standardized GRS  
284 percentiles almost exclusively below the 50<sup>th</sup> percentile of modern humans. In contrast,  
285 predictions of disease risk in the genomes of ancient agriculturalists and hunter-  
286 gatherers span the full range of modern humans.

287           One possible concern is that sequencing coverage and the proportion of disease-  
288 associated loci that were successfully called vary by subsistence type (Kruskal-Wallis  
289 tests, p-values = 0.03 and 0.01, Figure 4E and 4F, respectively). Differences in  
290 sequencing coverage between pastoralists and hunter-gatherers appear to be driven by  
291 three older hominin samples – Altai Neandertal (52x), Ust'-Ishim (42x), and Denisovan  
292 (30x). However, these differences in sequencing coverage do not lead to significant  
293 differences in the proportion of disease-associated loci that are called in the genomes of  
294 pastoralists and hunter-gatherers.

295

### 296 *Geographic patterns*

297           We tested whether genetic estimates of disease risks vary geographically (Table  
298 1). Comparing standardized GRS percentiles and latitude, we find that northern ancient  
299 individuals tend to have healthier genomes (Pearson correlation test,  $r = -0.23$ , p-value  
300 =  $5.0 \times 10^{-3}$ ). Interpretation of these results should be tempered by two considerations:  
301 1) most of the ancient samples with sequence data were discovered in Eurasia and 2)  
302 there is substantial heterogeneity in genetic risk scores across space. In contrast to  
303 latitudinal patterns, the relationship between standardized GRS percentile and longitude  
304 does not reach statistical significance ( $r = -0.13$ , p-value = 0.11). Despite heterogeneity  
305 in standardized GRS percentiles and limited sampling, our results suggest that genetic  
306 disease risks may have followed a North-South geographic cline in the past.

307

### 308 **Disease Categories**

309 Which types of diseases drive differences in genetic risk scores between ancient  
310 and modern individuals? To address this question, we also estimated genetic risk of  
311 ancient hominins for nine disease categories (Supplemental Table S1). On average,  
312 ancient individuals had significantly lower genetic risk of cancers, miscellaneous  
313 diseases, and neurological/psychological diseases than modern humans (Figure 5A; p-  
314 values < 0.05). Table 1 lists summary statistics and p-values from Wilcoxon signed  
315 ranked tests for each disease category. Only cardiovascular-associated diseases were  
316 predicted to have greater risk in ancient hominins compared to modern humans (p-  
317 value =  $1.8 \times 10^{-5}$ ). Risks of allergy/autoimmune, morphological/muscular,  
318 metabolism/weight, and dental/periodontal diseases were not significantly different  
319 between ancient and modern hominins (p-values > 0.05). Thus, the genetic disease  
320 burden of ancient hominins appears to be less than modern humans due to reduced risk  
321 of cancer and neurological disease along with other unclassified diseases.

322

### 323 *Effects of sample age with respect to disease categories*

324 We calculated genetic risks for nine disease categories to determine whether  
325 temporal trends were consistent across each disease type. Figure 5B displays the  
326 standardized GRS percentile by disease category summarized for each sample age  
327 range. Broadly speaking, we find that genetic disease risks change over time. Some  
328 disease categories show progressive changes over time. Using Jonckheere-Terpstra  
329 tests, we find that older samples have higher standardized GRS percentiles for  
330 allergy/autoimmune diseases, cancers, and gastrointestinal/liver diseases (p-values <  
331 0.05). Temporal trends for metabolic diseases were marginally significant (p-value =

332 0.054). See Table 1 for complete results of Jonckheere-Terpstra tests by disease  
333 category. Taken together, the time-dependent results suggest that more recent ancient  
334 hominins have lower disease load due to reduced risk of immune-related and  
335 gastrointestinal diseases, cancer, and metabolism-related disorders.

336

### 337 *Subsistence type and disease categories*

338 We tested whether differences in genetic risk for ancient individuals with different  
339 modes of subsistence were consistent across all disease categories or whether a single  
340 disease category drove disparities in genetic risk between subsistence groups. Using  
341 Kruskal-Wallis tests, we find that form of subsistence affects predicted genetic risk of  
342 allergy/autoimmune diseases, cancers, dental/periodontal diseases, and  
343 gastrointestinal/liver diseases in ancient individuals (Figure 5C). Table 1 includes full  
344 results from the Kruskal-Wallis test for each disease category. For each significant  
345 disease category, we also performed post-hoc Dunn tests with Benjamini-Hochberg  
346 correction; the z-statistics and p-values from these tests are displayed in Table 2. Both  
347 the allergy/autoimmune and gastrointestinal/liver disease categories (which share many  
348 of the same disease-associated loci) show significantly lower genetic risk in pastoralists  
349 than agriculturalists and hunter gatherers. Pastoralists also have significantly reduced  
350 risk for cancer compared to agriculturalists. Agriculturalists have a higher genetic risk for  
351 dental/periodontal diseases than hunter-gatherers and pastoralists. In general,  
352 pastoralists possess extremely healthy genomes, especially for cancers and immune-  
353 related, periodontal, and gastrointestinal diseases.

354



### 355 *Geographic patterns and disease categories*

356 Finally, we examined geographic patterns in genetic risk scores for each disease  
357 category using Pearson correlation tests (see Table 1 for results). For most disease  
358 types, estimates of genetic risk did not follow a geographic cline. However, decreased  
359 risk of disease in northern ancient individuals appears to be driven by two disease  
360 categories: cancer ( $r = -0.29$ ) and dental/periodontal diseases ( $r = -0.20$ ). This negative  
361 correlation between latitude and standardized GRS percentile is even stronger amongst  
362 Eurasian ancient samples (cancer:  $r = -0.33$ ; dental / periodontal diseases:  $r = -0.22$ ).  
363 Focusing on longitude, we estimate that the genetic risk of cardiovascular diseases was  
364 lower for ancient individuals in the east compared to the west ( $r = -0.20$ ). This trend is  
365 slightly weaker when comparing only individuals from Eurasia ( $r = -0.18$ ).

366

### 367 **Ancient precision medicine**

368 Although there are overarching patterns of risk based on type of subsistence and  
369 sample age, each ancient individual has their own unique disease profile. These ancient  
370 disease risk profiles are summarized in Table S1 and can be viewed via an interactive  
371 web application: <http://popgen.gatech.edu/ancient-health/>. We found that the Altai  
372 Neandertal had poor genomic health, with a standardized GRS of 97%. This was due in  
373 part to high risk for immune-related diseases, cancers, gastrointestinal and liver  
374 diseases, metabolic-related disorders, and morphological and muscular diseases.  
375 However, the Altai Neandertal genome did not have an elevated number of risk alleles  
376 for all disease classes – we estimated a low risk for cardiovascular disease and close to  
377 average risk for periodontal and miscellaneous diseases. Our estimation of genetic risk

378 of cardiovascular disease for the Tyrolean Iceman supports previous evidence that this  
379 ancient man had a predisposition for this disease (Keller, et al. 2012). Additionally, the  
380 Tyrolean Iceman had high risk for immune-related diseases, gastrointestinal diseases,  
381 and metabolic-related disorders. Despite these elevated risks, we also inferred that the  
382 genome of the Iceman was relatively healthy for morphological and neurological  
383 diseases.

384

## 385 **DISCUSSION**

386 Integrating ancient DNA with knowledge of disease associated loci from modern  
387 populations provides new insights into past human health. Overall, we find that the GRS  
388 percentiles of ancient hominins span the full range of modern humans. There are some  
389 ancient individuals whose genomes place them among the healthiest or least healthy  
390 individuals living in the present. Ancient individuals are enriched for standardized GRS  
391 percentiles that are below 5% (Figure 3A), which may partially be explained by the fact  
392 that our set of known disease-associated loci only includes genetic variants that  
393 segregate in modern populations. Thus, we are excluding disease variants that  
394 segregated in the past and possibly underestimating the GRS percentile of ancient  
395 individuals, i.e. predicted scores are lower than the true genetic disease risk.

396 The genomic health of ancient individuals appears to have improved over time  
397 (Figure 3B). This calls into question the idea that genetic load has been increasing in  
398 human populations (Lynch 2016). However, there exists a perplexing pattern: ancient  
399 individuals who lived within the last few thousand years have healthier genomes, on  
400 average, than present day humans. This deviation from the observed temporal trend of  
401 improved genomic health opens up the possibility that deleterious mutations have

402 accumulated in human genomes in the recent past. The data presented here do not  
403 provide adequate information to address this hypothesis, which we leave for future  
404 follow-up studies.

405 Genomic studies have shown that there are lingering effects of ancient  
406 introgression on the health of modern-day humans. Here, we estimated that the Altai  
407 Neandertal genome has an elevated risk of neurological diseases (80<sup>th</sup> percentile  
408 compared to modern humans). This is consistent with previous findings from electronic  
409 health records and patient genomes that linked Neandertal haplotypes with increased  
410 risk for depression along with tobacco addiction, urinary tract disorders, and skin lesions  
411 (Simonti, et al. 2016). Other studies have shown that Neandertal and Denisovan  
412 introgression impacted the immune system of present-day humans (Abi-Rached, et al.  
413 2011; Dannemann, et al. 2016; Deschamps, et al. 2016). In our study, the estimated  
414 risk of immune-related diseases in Neandertal and Denisovan genomes were at the top  
415 of the distribution (above 100% and 97% of all modern genomes, respectively). A  
416 previous study showed that archaic alleles at three toll-like receptor genes are  
417 associated with reduced microbial resistance and increased risk of allergic diseases  
418 (Dannemann, et al. 2016). Despite these ill effects in modern environments, some  
419 archaic alleles are quite prevalent in modern Europeans and Asians likely due to natural  
420 selection (Deschamps, et al. 2016). For example, there is evidence that significant  
421 changes to the coding regions of immunity related genes coincided with the shift in  
422 subsistence from hunting and gathering to farming (Deschamps, et al. 2016). Our  
423 results suggest that hunter-gatherers had higher genetic risk of allergy and autoimmune  
424 disease compared to ancient agriculturalists and pastoralists.

425           There have been two great dietary shifts in recent human evolution: 1) the  
426 consumption of carbohydrate rich diets with the onset of farming (approximately 10,000  
427 years before present) and 2) the utilization of processed flour and sugar since the  
428 industrial revolution (approximately 1850 AD). Compared to the other ancient hominins  
429 with different forms of subsistence, we estimated that ancient pastoralists had healthier  
430 genomes due to low risk for immune-related diseases, gastrointestinal diseases, and  
431 cancers. It is unclear why pastoralists would have the lowest risk in these specific  
432 disease categories. We caution that this pattern may be the result of technical issues,  
433 as pastoralists have the smallest sample size (only 19 individuals) and geographic  
434 range (between 40-90°E longitude and 45-55°N latitude, Figure 1B). Because  
435 populations that have different subsistence types also differ in other ways, the lower  
436 GRS of pastoral populations may be due to other factors, including demographic  
437 history.

438           Comparisons amongst ancient individuals suggest that the transition to  
439 agriculture brought about changes not only to diet, but also genetic risk for certain  
440 diseases. Based on genomic data, we inferred that ancient agriculturalists had  
441 increased risk for dental caries and periodontal diseases. However, slight caution is  
442 advised about over interpreting this pattern as dental caries and periodontal diseases  
443 had the smallest number of risk loci ( $k = 40$ ). Previous comparisons of ancient skeletal  
444 remains showed that hunter-gatherers had fewer caries than early agriculturalists  
445 (Tillier, et al. 1995; Kerr 1998; Trinkaus, et al. 2000; Lebel and Trinkaus 2002). The  
446 greater prevalence of dental caries in early agriculturalists may be partially due to

447 differences in oral microbiota diversity, as ancient hunter-gatherers were less likely to  
448 have periodontal disease-associated taxa in calcified dental plaques (Adler, et al. 2013).

449         We note that genomic health does not necessarily equate to phenotypic health.  
450 Genetic risk scores are not deterministic, instead they merely indicate whether an  
451 individual has a predisposition to a particular disease. In addition, alleles that contribute  
452 to disease in modern environments may not have had the same effects in past  
453 environments. Because of the large genetic distances between modern humans and  
454 archaic hominins, we caution against over-interpreting genomic estimates of  
455 Neanderthal and Denisovan health.

456         Genomic studies, such as this one, provide an opportunity for incomplete or  
457 poorly preserved ancient samples to contribute valuable information about the health  
458 and disease status of our ancestors. As more ancient hominin genomes are sequenced  
459 and new disease-associated loci are identified, there will be unprecedented  
460 opportunities to probe changes in human health over time.

461 **LITERATURE CITED**

- 462 Abi-Rached L, Jobin MJ, Kulkarni S, McWhinnie A, Dalva K, Gragert L, Babrzadeh F,  
463 Gharizadeh B, Luo M, Plummer FA, et al. 2011. The Shaping of Modern Human  
464 Immune Systems by Multiregional Admixture with Archaic Humans. *Science*  
465 334:89-94.
- 466 Adler CJ, Dobney K, Weyrich LS, Kaidonis J, Walker AW, Haak W, Bradshaw CJA,  
467 Townsend G, Soltysiak A, Alt KW, et al. 2013. Sequencing ancient calcified  
468 dental plaque shows changes in oral microbiota with dietary shifts of the Neolithic  
469 and Industrial revolutions. *Nature Genetics* 45:450-455.
- 470 Andrushko VA, Verano JW. 2008. Prehistoric trepanation in the Cuzco region of Peru: A  
471 view into an ancient Andean practice. *American Journal of Physical Anthropology*  
472 137:4-13.
- 473 Binder M, Roberts C, Spencer N, Antoine D, Cartwright C. 2014. On the Antiquity of  
474 Cancer: Evidence for Metastatic Carcinoma in a Young Man from Ancient Nubia  
475 (c. 1200BC). *Plos One* 9.
- 476 Burdett T, Hall P, Hasting E, Hindorff L, Junkins H, Klemm A, MacArthur J, Manolio T,  
477 Morales J, Parkinson H. 2016. The NHGRI-EBI Catalog of published genome-  
478 wide association studies. Available at: [www.ebiacuk/gwas](http://www.ebiacuk/gwas).
- 479 Chang W, Cheng J, Allaire J, Xie Y, McPherson J. 2017. Shiny: web application  
480 framework for R. R package version 1.03.
- 481 Chatterjee N, Shi J, Garcia-Closas M. 2016. Developing and evaluating polygenic risk  
482 prediction models for stratified disease prevention. *Nat Rev Genet* 17:392-406.

483 Cordain L, Eaton SB, Sebastian A, Mann N, Lindeberg S, Watkins BA, O'Keefe JH,  
484 Brand-Miller J. 2005. Origins and evolution of the Western diet: health  
485 implications for the 21st century. *American Journal of Clinical Nutrition* 81:341-  
486 354.

487 Corona E, Chen R, Sikora M, Morgan AA, Patel CJ, Ramesh A, Bustamante CD, Butte  
488 AJ. 2013. Analysis of the genetic basis of disease in the context of worldwide  
489 human relationships and migration. *PLoS Genet* 9:e1003447.

490 Dannemann M, Andres AM, Kelso J. 2016. Introgression of Neandertal- and Denisovan-  
491 like Haplotypes Contributes to Adaptive Variation in Human Toll-like Receptors  
492 (vol 98, pg 22, 2016). *American Journal of Human Genetics* 98:399-399.

493 Deschamps M, Laval G, Fagny M, Itan Y, Abel L, Casanova JL, Patin E, Quintana-Murci  
494 L. 2016. Genomic Signatures of Selective Pressures and Introgression from  
495 Archaic Hominins at Human Innate Immunity Genes. *American Journal of Human  
496 Genetics* 98:5-21.

497 Entezami P, Fox DA, Clapham PJ, Chung KC. 2011. Historical perspective on the  
498 etiology of rheumatoid arthritis. *Hand Clin* 27:1-10.

499 Field Y, Boyle EA, Telis N, Gao ZY, Gaulton KJ, Golan D, Yengo L, Rocheleau G,  
500 Froguel P, McCarthy MI, et al. 2016. Detection of human adaptation during the  
501 past 2000 years. *Science* 354:760-764.

502 Hawks J, Wang ET, Cochran GM, Harpending HC, Moyzis RK. 2007. Recent  
503 acceleration of human adaptive evolution. *Proc Natl Acad Sci U S A* 104:20753-  
504 20758.

- 505 Hofreiter M, Paijmans JL, Goodchild H, Speller CF, Barlow A, Fortes GG, Thomas JA,  
506 Ludwig A, Collins MJ. 2015. The future of ancient DNA: Technical advances and  
507 conceptual shifts. *Bioessays* 37:284-293.
- 508 Keller A, Graefen A, Ball M, Matzas M, Boisguerin V, Maixner F, Leidinger P, Backes C,  
509 Khairat R, Forster M, et al. 2012. New insights into the Tyrolean Iceman's origin  
510 and phenotype as inferred by whole-genome sequencing. *Nat Commun* 3:698.
- 511 Kerr NW. 1998. Prevalence and natural history of periodontal disease in prehistoric  
512 Scots (pre-900 AD). *J Periodontal Res* 33:131-137.
- 513 Lachance J. 2010. Disease-associated alleles in genome-wide association studies are  
514 enriched for derived low frequency alleles relative to HapMap and neutral  
515 expectations. *BMC Med Genomics* 3:57.
- 516 Lachance J, Tishkoff SA. 2013. SNP ascertainment bias in population genetic analyses:  
517 why it is important, and how to correct it. *Bioessays* 35:780-786.
- 518 Lazaridis I, Nadel D, Rollefson G, Merrett DC, Rohland N, Mallick S, Fernandes D,  
519 Novak M, Gamarra B, Sirak K, et al. 2016. Genomic insights into the origin of  
520 farming in the ancient Near East. *Nature* 536:419-424.
- 521 Lebel S, Trinkaus E. 2002. A carious Neandertal molar from the Bau-de-l'Aubesier,  
522 Vaucluse, France. *Journal of Archaeological Science* 29:555-557.
- 523 Li H. 2011. A statistical framework for SNP calling, mutation discovery, association  
524 mapping and population genetical parameter estimation from sequencing data.  
525 *Bioinformatics* 27:2987-2993.



- 526 Li H, Handsaker B, Wysoker A, Fennell T, Ruan J, Homer N, Marth G, Abecasis G,  
527 Durbin R, Genome Project Data Processing S. 2009. The Sequence  
528 Alignment/Map format and SAMtools. *Bioinformatics* 25:2078-2079.
- 529 Li Y, Willer C, Sanna S, Abecasis G. 2009. Genotype imputation. *Annu Rev Genomics*  
530 *Hum Genet* 10:387-406.
- 531 Lynch M. 2016. Mutation and Human Exceptionalism: Our Future Genetic Load.  
532 *Genetics* 202:869-875.
- 533 MacArthur J, Bowler E, Cerezo M, Gil L, Hall P, Hastings E, Junkins H, McMahon A,  
534 Milano A, Morales J. 2017. The new NHGRI-EBI Catalog of published genome-  
535 wide association studies (GWAS Catalog). *Nucleic acids research* 45:D896-  
536 D901.
- 537 Mathieson I, Lazaridis I, Rohland N, Mallick S, Patterson N, Roodenberg SA, Harney E,  
538 Stewardson K, Fernandes D, Novak M, et al. 2015. Genome-wide patterns of  
539 selection in 230 ancient Eurasians. *Nature* 528:499-503.
- 540 Murphy WA, Jr., Nedden Dz D, Gostner P, Knapp R, Recheis W, Seidler H. 2003. The  
541 iceman: discovery and imaging. *Radiology* 226:614-629.
- 542 Odes EJ, Randolph-Quinney PS, Steyn M, Throckmorton Z, Smilg JS, Zipfel B,  
543 Augustine TN, de Beer F, Hoffman JW, Franklin RD, et al. 2016. Earliest hominin  
544 cancer: 1.7-million-year-old osteosarcoma from Swartkrans Cave, South Africa.  
545 *South African Journal of Science* 112:100-104.
- 546 Orlando L, Gilbert MT, Willerslev E. 2015. Reconstructing ancient genomes and  
547 epigenomes. *Nat Rev Genet* 16:395-408.

- 548 Roth FP, Wakeley J. 2016. Taking Exception to Human Eugenics. *Genetics* 204:821-  
549 823.
- 550 Sainz S, Soriano G, Guarner C, Coll P, Vilardell F. 1989. More on ascitic fluid culture  
551 technique. *Hepatology* 9:662-663.
- 552 Simonti CN, Vernot B, Bastarache L, Bottinger E, Carrell DS, Chisholm RL, Crosslin  
553 DR, Hebring SJ, Jarvik GP, Kullo IJ, et al. 2016. The phenotypic legacy of  
554 admixture between modern humans and Neandertals. *Science* 351:737-741.
- 555 The 1000 Genomes Project Consortium. 2015. A global reference for human genetic  
556 variation. *Nature* 526:68-74.
- 557 Tillier AM, Arensburg B, Rak Y, Vandermeersch B. 1995. Middle Paleolithic Dental-  
558 Caries - New Evidence from Kebara (Mount Carmel, Israel). *Journal of Human*  
559 *Evolution* 29:189-192.
- 560 Trinkaus E, Smith RJ, Lebel S. 2000. Dental caries in the Aubesier 5 Neandertal  
561 primary molar. *Journal of Archaeological Science* 27:1017-1021.

562

563 **TABLES**

564

565 **Table 1.** Results of statistical tests between ancient hominin genetic risk scores compared to modern humans (Wilcoxon  
 566 signed rank test) and amongst ancient samples by sample age range (years BP; Jonckheere-Terpstra test), mode of  
 567 subsistence (Kruskal-Wallis test), and geographic location (latitude and longitude; Pearson's correlation tests). Boldface  
 568 indicates that the p-value is less than 0.05.

569

| Disease Type<br>(number of loci) | Relative to present-day |                                        | Sample age range |                                        | Subsistence |                                        | Latitude |       |                                        | Longitude                               |       |             |
|----------------------------------|-------------------------|----------------------------------------|------------------|----------------------------------------|-------------|----------------------------------------|----------|-------|----------------------------------------|-----------------------------------------|-------|-------------|
|                                  | V                       | p-value                                | JT               | p-value                                | $\chi^2$    | p-value                                | r        | t     | p-value                                | r                                       | t     | p-value     |
| All Diseases (3180)              | 3266                    | <b><math>2.6 \times 10^{-5}</math></b> | 5275             | <b><math>1.0 \times 10^{-3}</math></b> | 12.34       | <b><math>2.0 \times 10^{-3}</math></b> | -0.23    | -2.86 | <b><math>5.0 \times 10^{-3}</math></b> | -0.13                                   | -1.61 | 0.11        |
| Allergy/Autoimmune (770)         | 5028                    | 0.51                                   | 4775.5           | <b>0.035</b>                           | 7.41        | <b>0.02</b>                            | -0.06    | -0.69 | 0.49                                   | -0.09                                   | -1.09 | 0.28        |
| Cancers (644)                    | 4083                    | <b>0.03</b>                            | 5049             | <b><math>2.0 \times 10^{-3}</math></b> | 9.73        | <b>0.01</b>                            | -0.29    | -3.71 | <b><math>3.0 \times 10^{-4}</math></b> | -0.08                                   | -0.94 | 0.35        |
| Cardiovascular (232)             | 7659.5                  | <b><math>1.8 \times 10^{-5}</math></b> | 4523.5           | 0.18                                   | 3.26        | 0.20                                   | -0.06    | -0.70 | 0.49                                   | -0.20                                   | -2.44 | <b>0.02</b> |
| Dental/Periodontal (40)          | 6203                    | 0.10                                   | 4310.5           | 0.38                                   | 14.15       | <b><math>8.5 \times 10^{-4}</math></b> | -0.20    | -2.48 | <b>0.01</b>                            | -0.13                                   | -1.57 | 0.12        |
| Gastrointestinal/Liver (488)     | 4553                    | 0.09                                   | 4770             | <b>0.033</b>                           | 17.82       | <b><math>1.4 \times 10^{-4}</math></b> | -0.15    | -1.83 | 0.07                                   | -0.12                                   | -1.49 | 0.14        |
| Metabolism/Weight (309)          | 5052.5                  | 0.54                                   | 4674             | 0.054                                  | 2.29        | 0.32                                   | -0.13    | -1.58 | 0.12                                   | 0.03                                    | 0.42  | 0.68        |
| Miscellaneous (532)              | 3228                    | <b><math>1.9 \times 10^{-5}</math></b> | 4451             | 0.24                                   | 3.63        | 0.16                                   | -0.06    | -0.74 | 0.46                                   | <b><math>-3.2 \times 10^{-3}</math></b> | -0.04 | 0.97        |
| Morphological/Muscular (239)     | 5898                    | 0.38                                   | 4291.5           | 0.42                                   | 3.62        | 0.16                                   | 0.14     | 1.70  | 0.09                                   | -0.14                                   | -1.66 | 0.10        |
| Neurological/Psychological (459) | 2823                    | <b><math>1.8 \times 10^{-6}</math></b> | 4451.5           | 0.25                                   | 2.83        | 0.24                                   | 0.01     | 0.12  | 0.90                                   | <b><math>2.8 \times 10^{-3}</math></b>  | 0.03  | 0.97        |

570

571 **Table 2.** Statistical results of ancient genetic risk score comparisons between  
572 subsistence types (AG – Agriculturalist; PA – Pastoralist; HG – Hunter-Gatherer) from  
573 Dunn tests with Benjamini-Hochberg correction, which were performed on disease  
574 categories with significant differences between subsistence groups (see Table 1).  
575 Boldface indicates that the p-value is less than 0.05.

576

|                        | AG vs HG |                            | AG vs PA |                                | HG vs PA |                            |
|------------------------|----------|----------------------------|----------|--------------------------------|----------|----------------------------|
|                        | z        | p-value                    | z        | p-value                        | z        | p-value                    |
| All Diseases           | -1.35    | 0.09                       | 2.98     | <b>2.1×10<sup>-3</sup></b>     | 3.38     | <b>1.1×10<sup>-3</sup></b> |
| Allergy/Autoimmune     | -1.40    | 0.08                       | 2.08     | <b>0.03</b>                    | 2.70     | <b>0.01</b>                |
| Cancers                | 0.90     | 0.18                       | 3.09     | <b>3.0×10<sup>-3</sup></b>     | 1.78     | 0.06                       |
| Dental/Periodontal     | 3.04     | <b>3.5×10<sup>-3</sup></b> | 2.67     | <b>5.7×10<sup>-3</sup></b>     | -0.15    | 0.44                       |
| Gastrointestinal/Liver | 0.98     | 0.16                       | 4.21     | <b>&lt;1.0×10<sup>-3</sup></b> | 2.61     | <b>6.8×10<sup>-3</sup></b> |

577

578 **FIGURES**

579 **Figure 1**

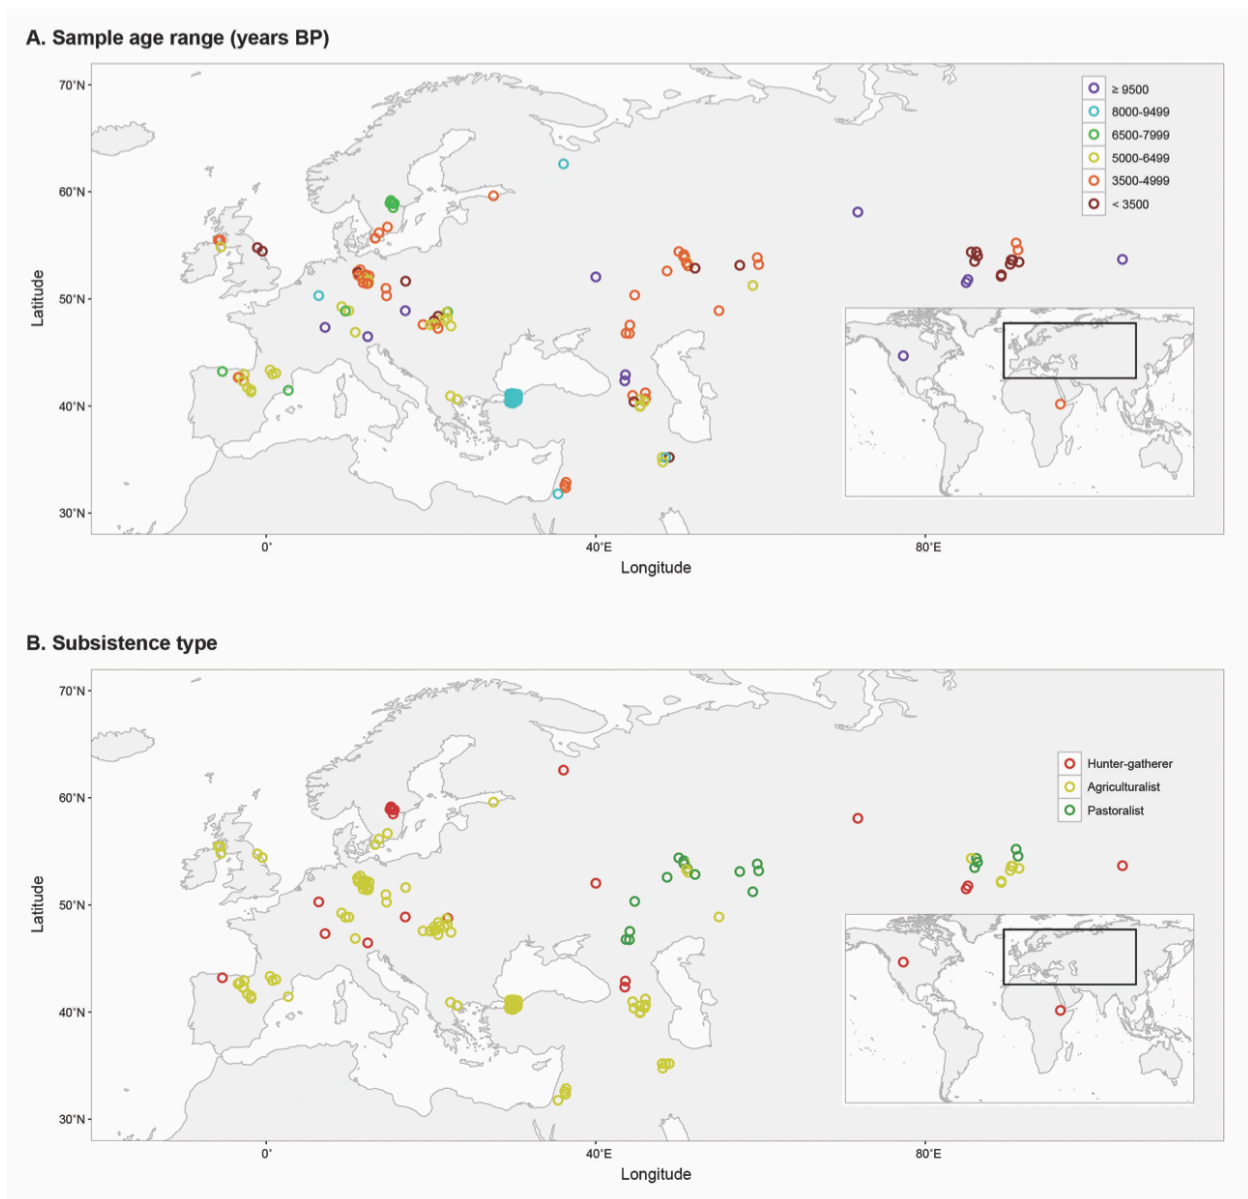

580

581 **Figure 1:** Location, age, and subsistence type of ancient hominins. Geographic  
582 distribution of 147 ancient individuals by (A) sample age range in years BP and (B)  
583 subsistence type. Over 50% of all disease-associated variants were successfully called  
584 for each individual, and geographical locations were jittered to clarify densely sampled  
585 locations.

586 **Figure 2**

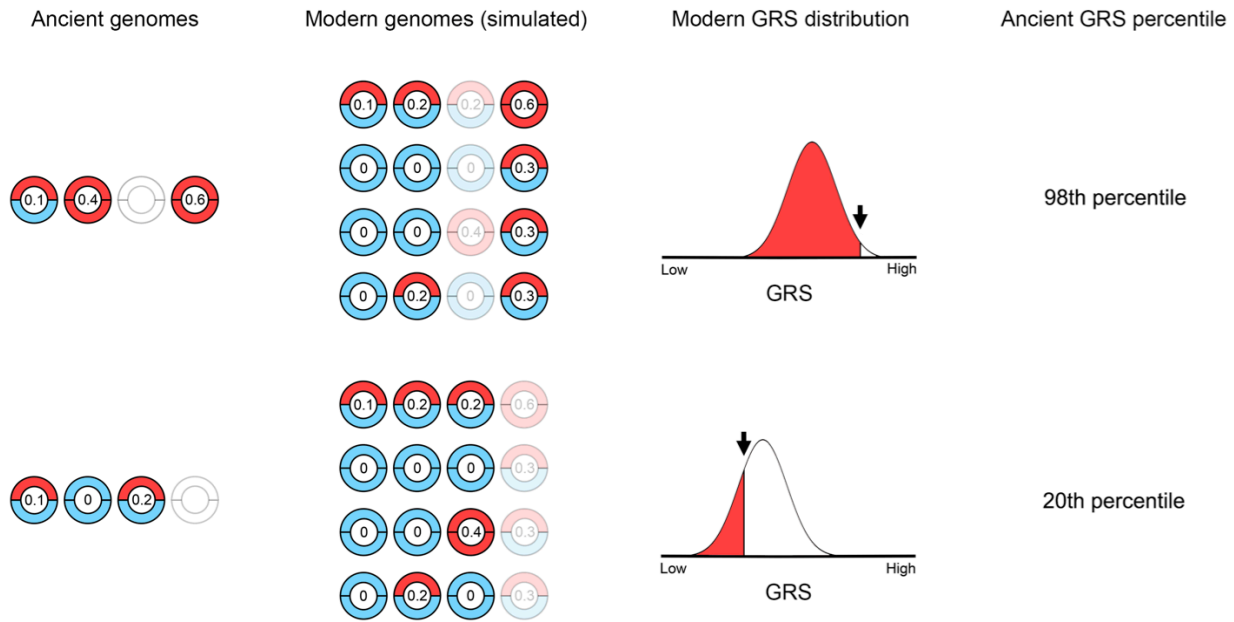

587

588

589 **Figure 2:** Schematic of how standardized GRS percentiles were estimated for each  
590 ancient sample. PokéPlots are shown for each disease locus. Risk alleles are indicated  
591 by a red hemisphere, protective alleles are indicated by a blue hemisphere, and  
592 numbers denote beta coefficients. Disease loci without genotypic information in the  
593 focal ancient individual are masked when estimating GRS for simulated modern  
594 humans. Ancient GRS are compared to the distribution of the simulated modern GRS to  
595 determine the ancient standardized GRS percentile. The simulated modern GRS  
596 distribution differs for each ancient hominin based on which disease loci have known  
597 genotypic information.

598 **Figure 3**

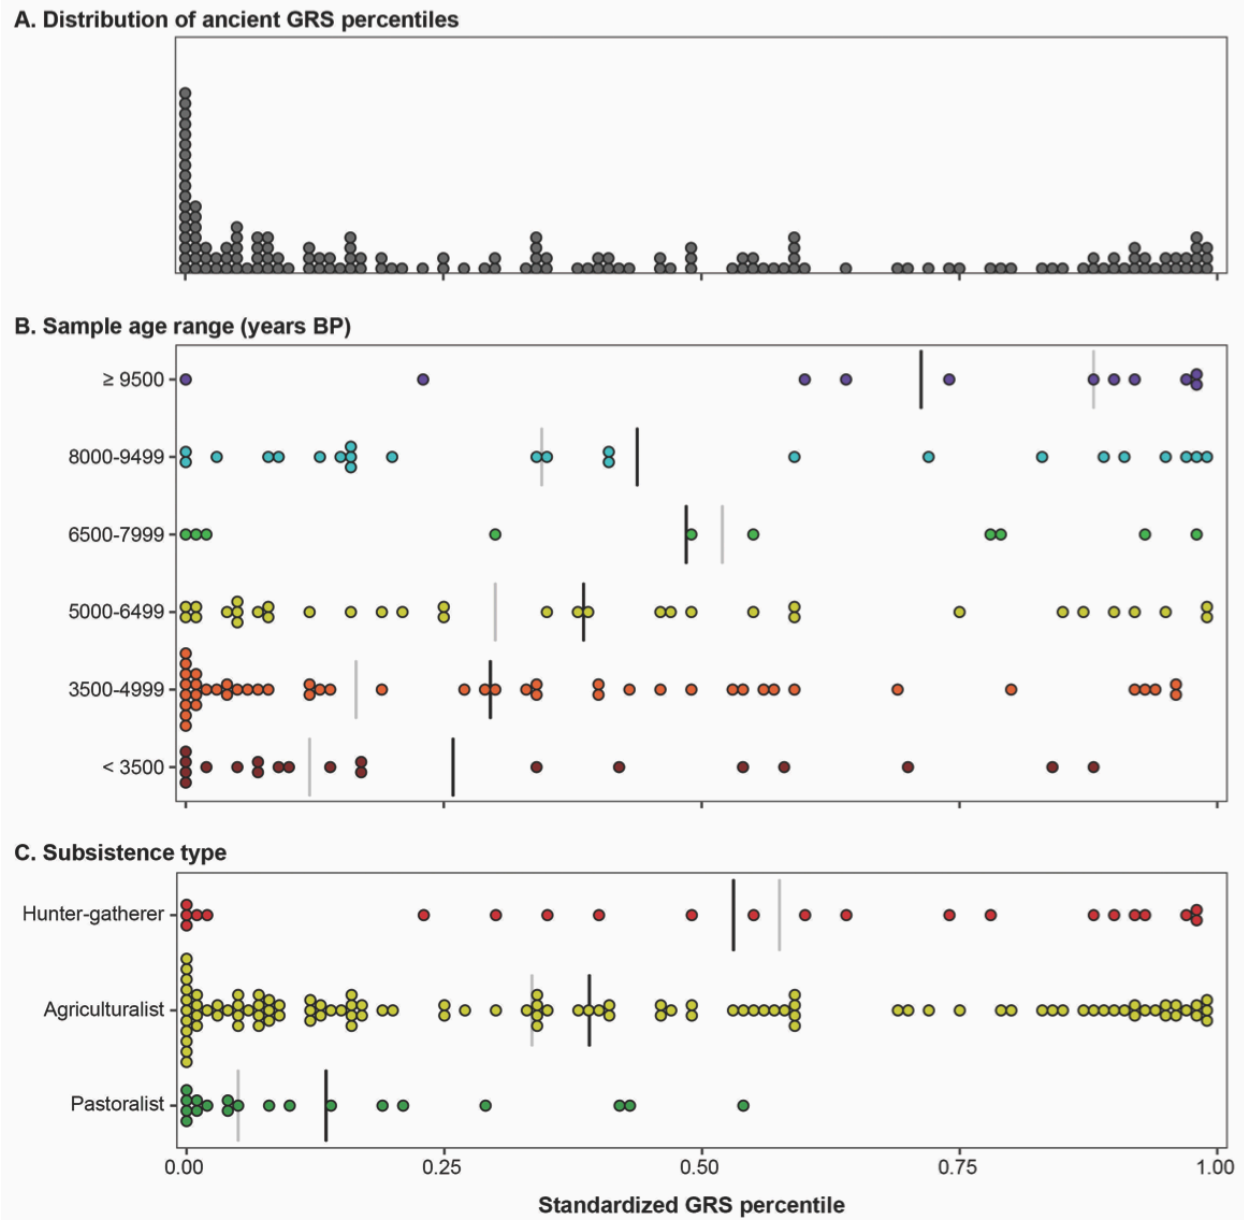

599

600 **Figure 3:** Ancient genetic risk scores span the full range of modern humans. (A) The  
601 distribution of ancient standardized GRS percentiles, which includes an excess of  
602 healthy individuals below the 5<sup>th</sup> percentile. Ancient standardized GRS percentiles  
603 separated by (B) age range and (C) subsistence type. Group means indicated by black  
604 line and group medians denoted by grey line.

605 **Figure 4**

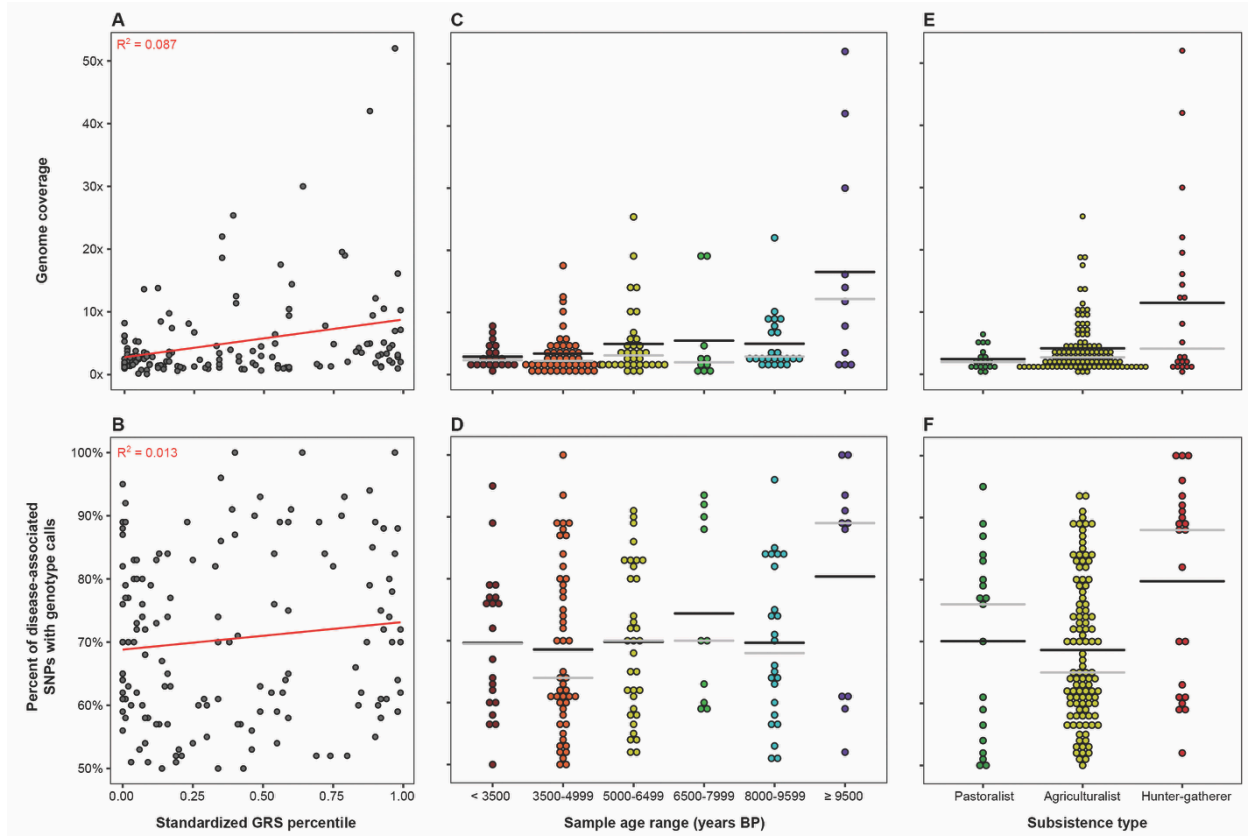

606

607

608 **Figure 4:** Sequence coverage and sample quality have minimal effect on genetic risk

609 scores. Genome coverage (top) and proportion of disease-associated loci called

610 (bottom) by genetic risk percentile (left), age range (center), and subsistence type

611 (right). Group means and medians indicated by black and grey lines, respectively.

612



613 **Figure 5**

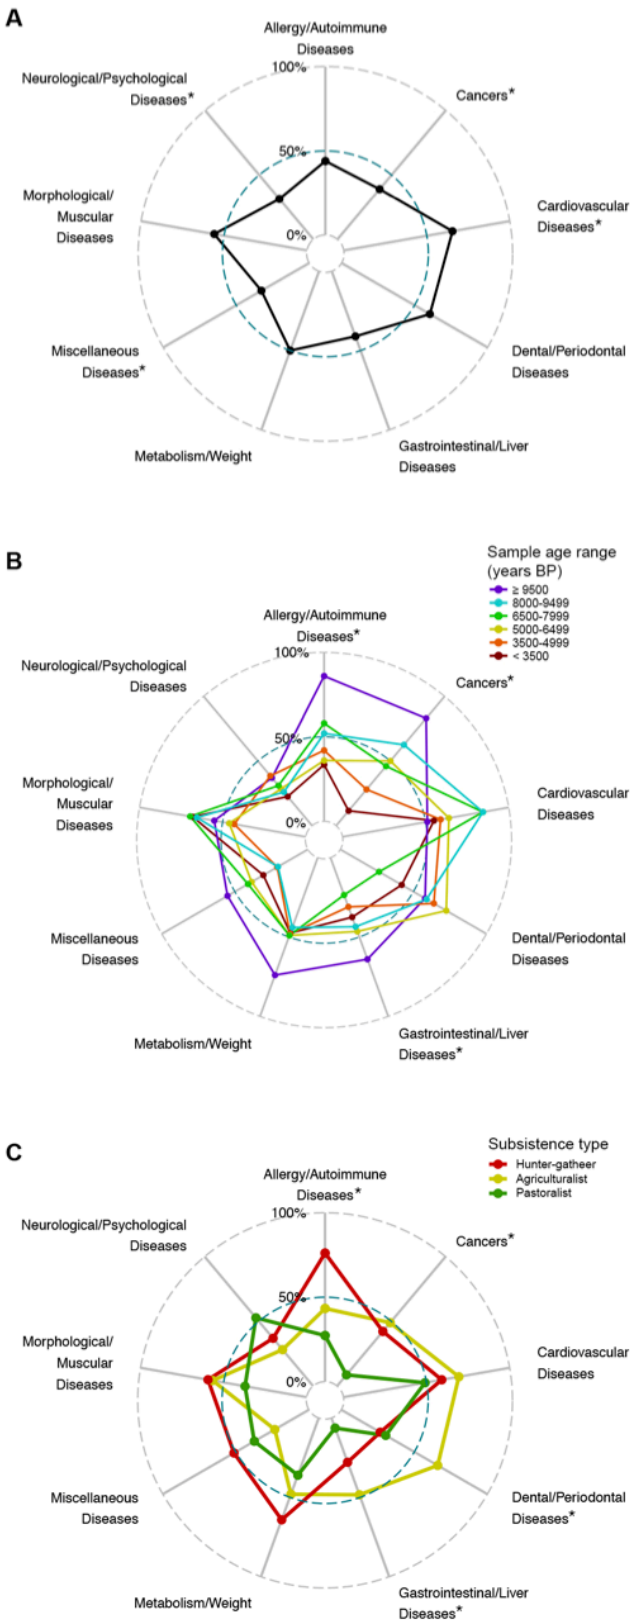

614

615 **Figure 5:** Risk radars of genomic health for ancient samples. The length of each spoke  
616 corresponds to a standardized GRS percentile. Healthy individuals have smaller shapes  
617 in risk radar plots. (A) Standardized GRS percentile by disease category for all ancient  
618 hominins summarized as median risk score. The median of genetic disease risk in  
619 modern humans is the 50<sup>th</sup> percentile. Temporal (B) and subsistence (C) trends of  
620 median ancient genetic risk by disease category. Disease categories with significant  
621 differences (p-value < 0.05) from Table 1 are denoted by \*.
